# Supplementary material for: Mesalazine granule formulation improves clinical data in Crohn's disease compared with tablet formulation
Source: PubMed Central journal article supplement (PMC7721736; doi:10.1038/s41598-020-78603-9), 2020-12-07

# **Mesalazine granule formulation improves clinical data in Crohn's disease compared with tablet formulation**

Satoshi Tamura<sup>1</sup>, Natsuki Ishida<sup>1</sup>, Takahiro Miyazu<sup>1</sup>, Shunya Onoue<sup>1</sup>, Shinya Tani<sup>1</sup>, Mihoko Yamade<sup>1</sup>, Yasushi Hamaya<sup>1</sup>, Moriya Iwaizumi<sup>3</sup>, Satoshi Osawa<sup>2</sup>, Takahisa Furuta<sup>4</sup>, and Ken Sugimoto<sup>1\*</sup>

<sup>1</sup>First Department of Medicine, Hamamatsu University School of Medicine, 1-20-1 Handayama, Higashi-ku, Hamamatsu 431-3192, Japan

<sup>2</sup>Department of Endoscopic and Photodynamic Medicine, Hamamatsu University School of Medicine, 1-20-1 Handayama, Higashi-ku, Hamamatsu 431-3192, Japan

<sup>3</sup>Department of Laboratory Medicine, Hamamatsu University School of Medicine, 1-20-1 Handayama, Higashi-ku, Hamamatsu 431-3192, Japan

<sup>4</sup>Center for Clinical Research, Hamamatsu University School of Medicine, 1-20-1 Handayama, Higashi-ku, Hamamatsu 431-3192, Japan

## **\*Corresponding author:**

Ken Sugimoto, MD, PhD

First Department of Medicine, Hamamatsu University School of Medicine, 1-20-1 Handayama, Higashi-ku, Hamamatsu 431-3192, Japan

Tel: 81 53 435 2261

Fax: 81 53 434 9447

Email: [sugimken@hama-med.ac.jp](mailto:sugimken@hama-med.ac.jp)

# Supplemental Figure S1

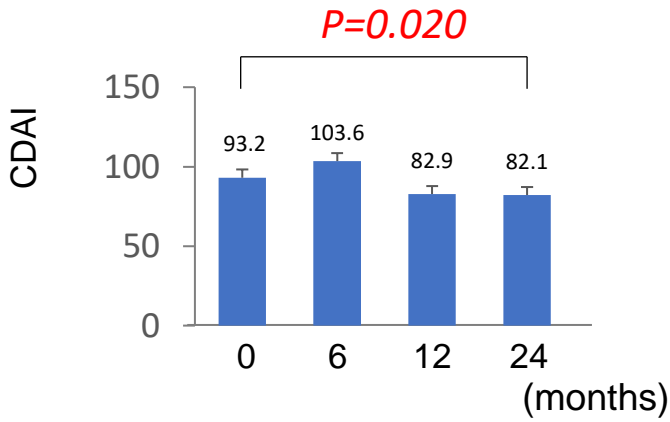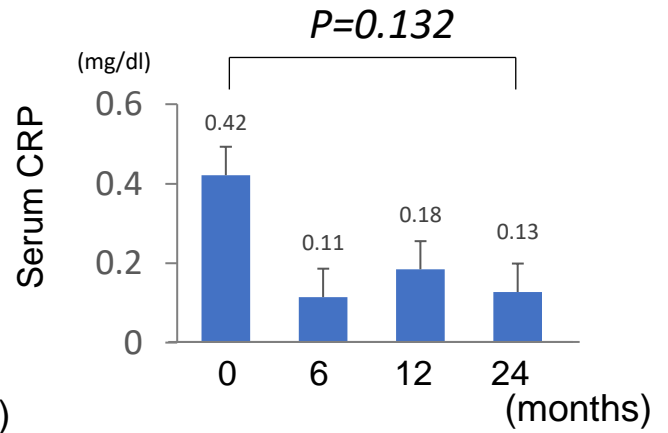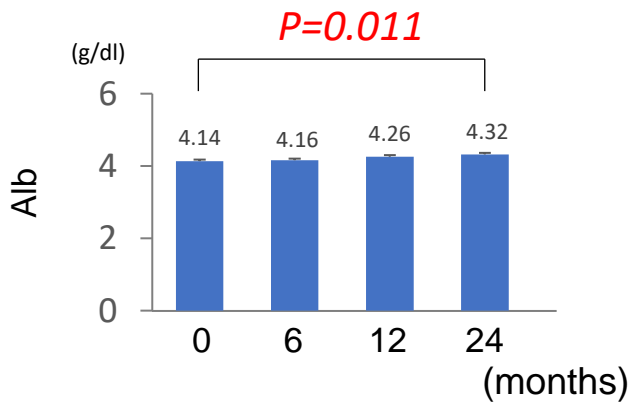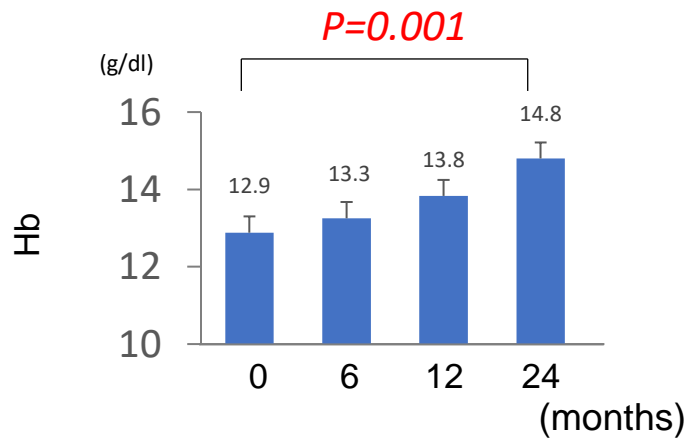

# Supplemental Figure S2

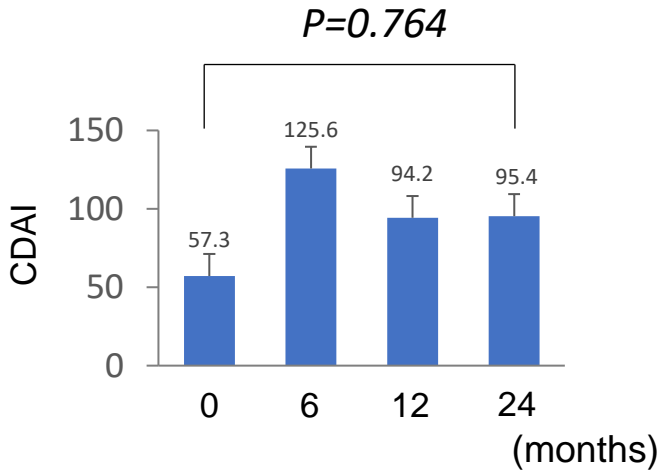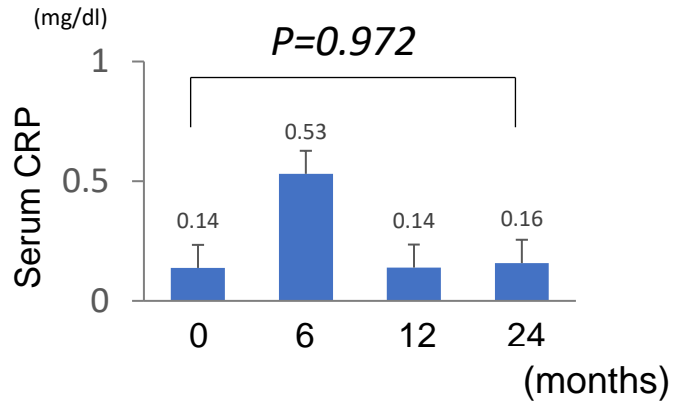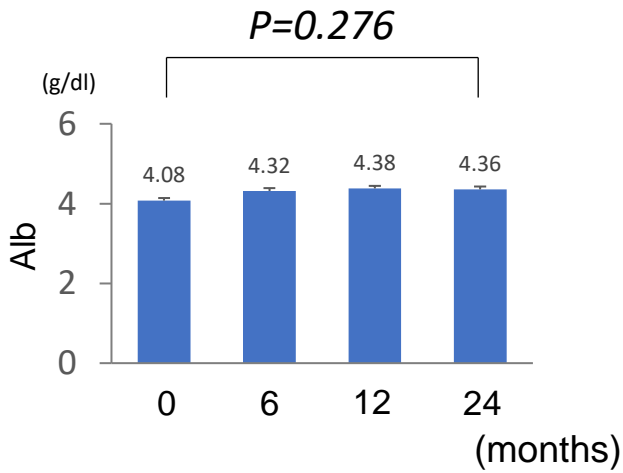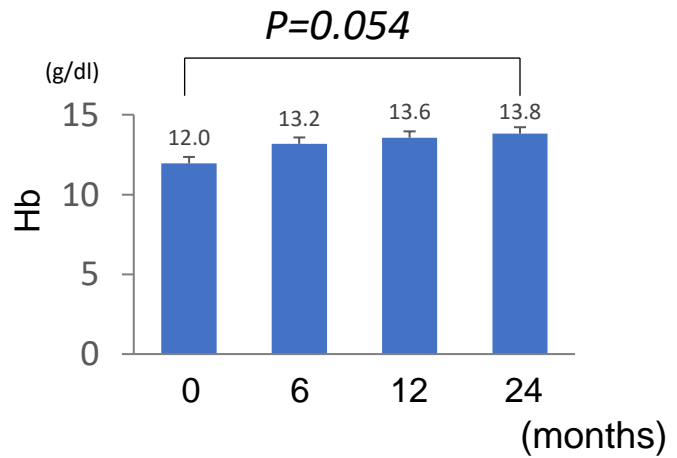

Supplement: 41598_2020_78603_MOESM1_ESM.pdf [file 41598_2020_78603_MOESM1_ESM.pdf]
